# Supplementary material for: Optimal Management for Stage IVB Endometrial Cancer: A Systematic Review
Source: MDPI journal article supplement (doi:10.3390/cancers15215123), 2023-10-24
Supplement: s1 [file s1]

Table S1 Primary surgery in stage IVB EC. EC endometrial cancer; EBRT external beam radiotherapy; OC ovarian cancer; OS overall survival; PFS progression free survival; PS performance status; RT residual tumor; VBT vaginal brachithery.

| Author         | Year | N of patients                               | Type of study       | Inclusion criteria                                                                                                                 | Hystotype                                                                                                             | N;%                                                                                | Localization of metastasis                               | N; %                       | Residual tumor                                                                                              | N;%                                               | Adjuvant treatment                                                               | Main results/Survival                                    | Main findings                                                                                                                                                                                                                                                       |                                                                                                                                                                                                                                                                       |
|----------------|------|---------------------------------------------|---------------------|------------------------------------------------------------------------------------------------------------------------------------|-----------------------------------------------------------------------------------------------------------------------|------------------------------------------------------------------------------------|----------------------------------------------------------|----------------------------|-------------------------------------------------------------------------------------------------------------|---------------------------------------------------|----------------------------------------------------------------------------------|----------------------------------------------------------|---------------------------------------------------------------------------------------------------------------------------------------------------------------------------------------------------------------------------------------------------------------------|-----------------------------------------------------------------------------------------------------------------------------------------------------------------------------------------------------------------------------------------------------------------------|
| Bristow et al. | 2000 | 65                                          | Retrospective study | Surgically treated stage IVB endometrial cancer patients                                                                           | Endometrioid<br>Serouos<br>Others                                                                                     | 22;<br>33.8<br>21;<br>32.4<br>22;<br>33.8                                          | Intra-abdominal metastasis<br>Extra-abdominal metastasis | 56;<br>86.2<br>9;<br>13.8  | Complete cytoreduction<br>Optimal cytoreduction (≤1 cm)<br>Suboptimal cytoreduction                         | NA<br>36;<br>55.4<br>29;<br>44.6                  | Chemo+radiotherapy<br>Only radiotherapy<br>Only chemotherapy                     | 14;<br>21.5<br>11;<br>16.9<br>27;<br>41.6                | OS 34.3 months for RT ≤ 1 cm<br><br>OS 11 months for RT > 1cm                                                                                                                                                                                                       | Survival outcomes are influenced by the extent of RT following cytoreductive surgery, the patient's age, and their PS. Additionally, in specific cases, a combination of postoperative chemotherapy and radiation therapy may offer potential therapeutic advantages. |
| Ayhan et al.   | 2002 | 37                                          | Retrospective study | Surgically treated stage IVB endometrial cancer patients                                                                           | Endometrioid<br>Others                                                                                                | 29;<br>78.4<br>8;<br>21.6                                                          | Intra-abdominal metastasis<br>Extra-abdominal metastasis | 31;<br>83.8<br>6;<br>16.2  | Complete cytoreduction<br>Optimal cytoreduction (≤1 cm)<br>Suboptimal cytoreduction                         | 12;<br>32.4<br>10; 27<br>15;<br>55.5              | Chemo+radiotherapy<br>Only radiotherapy<br>Only chemotherapy                     | 10;<br>33.3<br>10;<br>33.3<br>10;<br>33.3                | OS 48 months for RT 0<br><br>OS 25 months for RT ≤ 1 cm<br><br>Median OS 15 months                                                                                                                                                                                  | The absence of extra-abdominal metastasis, optimal cytoreduction, and multimodality adjuvant treatment are significant factors for improved survival outcomes.                                                                                                        |
| Haight et al   | 2023 | 88<br><br>63 primary surgery<br><br>25 NACT | Retrospective study | Surgically treated stage IVB endometrial cancer patients. The 63,6 % of patients were not suspected as stage IVB prior to surgery. | Endometrioid<br>Carcinosarcom<br>Clear cell<br>Dedifferentiated/undifferentiated<br>Mixed<br>Serous<br>High grade ESS | 35;<br>398<br>12;<br>13.6<br>1; 1.1<br><br>4; 4.5<br>7; 8<br>28;<br>31.8<br>1; 1.1 | Intra-abdominal metastasis<br>Extra-abdominal metastasis | 63;<br>71.6<br>25;<br>28.4 | Primary surgery:<br><br>Complete cytoreduction<br>Optimal cytoreduction (≤1 cm)<br>Suboptimal cytoreduction | <br><br>31;<br>49.2<br>20;<br>31.7<br>12;<br>19.1 | None<br>EBRT<br>Chemotherapy<br>Chemotherapy + EBRT<br>Chemotherapy + EBRT + VBT | 11;<br>12.5<br>1; 1.1<br>59; 67<br>11;<br>12.5<br>6; 6.8 | Median OS 38 months<br><br>No significant OS difference between optimal and complete cytoreduction.<br><br>Trends in improved OS were noted for patients who had fewer metastatic lesions and sub-centimeter disease, but these were not statistically significant. | Patients diagnosed with stage IVB endometrial cancer (2009 FIGO criteria) comprise a heterogenous cohort of disease. The distribution of metastases, quantification of tumor burden, and degree of cytoreduction are associated with prognosis.                       |

|               |      |                                       |                                  |                                                                                         |                                                                                                  |                                                                                    |                                                                                                                                                                                                                                                                     |                                                                                           |                                                                                                                                                                                                                                                                                                                                                                            |                                                                                                                                                                                                                                                          |
|---------------|------|---------------------------------------|----------------------------------|-----------------------------------------------------------------------------------------|--------------------------------------------------------------------------------------------------|------------------------------------------------------------------------------------|---------------------------------------------------------------------------------------------------------------------------------------------------------------------------------------------------------------------------------------------------------------------|-------------------------------------------------------------------------------------------|----------------------------------------------------------------------------------------------------------------------------------------------------------------------------------------------------------------------------------------------------------------------------------------------------------------------------------------------------------------------------|----------------------------------------------------------------------------------------------------------------------------------------------------------------------------------------------------------------------------------------------------------|
| Lee et al     | 2014 | 48                                    | Retrospective study              | Stage IVB serous EC, with pathologic evidence of intra-abdominal spread.                | Serous 48; 100                                                                                   | Intraabdominal 48; metastasis 100<br>Extra-abdominal 0                             | Complete cytoreduction 22; 46<br>Optimal cytoreduction 14; 29 (≤1 cm)<br>Suboptimal cytoreduction 12; 25                                                                                                                                                            | None 8; 17<br>chemotherapy 19; 40<br>chemotherapy and RT 16; 33<br>RT alone 5; 10         | OS 26.5 months for RT ≤ 1 cm<br><br>OS 12.6 months for RT > 1 cm                                                                                                                                                                                                                                                                                                           | Optimal cytoreduction and chemotherapy are the strongest determinants of long-term survival. Combined chemotherapy and RT were associated with an improvement in PFS and OS.                                                                             |
| Eto et al     | 2012 | 248                                   | Multicentre, retrospective study | Clinical or surgical stage IVB endometrial cancer patients, undergoing primary surgery. | Endometrioid 149; 61<br>Serous 43; 17<br>Clear cell 15; 6<br>Carcinosarcoma 23; 9<br>Other 18; 7 | Intra-abdominal 155; 62<br>alone<br>Extra-abdominal 57; 23<br>alone<br>Both 36; 15 | Postoperative residual disease<br>None 62; 25<br>≤1 cm 63; 25<br>>1 cm 12; 50<br><br>Intra-abdominal residual disease<br>None 101;<br>≤1 cm 41<br>>1 cm 52; 21<br>95; 38<br><br>Extra-abdominal residual disease<br>None 168;<br>≤1 cm 67<br>>1 cm 24; 10<br>56; 23 | None 28; 11<br>chemotherapy 185;<br>radiotherapy 75<br>chemo+radiotherapy 11; 4<br>24; 10 | Postoperative residual disease<br>OS 48 months for RT0<br>OS 25 months for RT ≤ 1 cm<br>OS 17 months for RT > 1 cm<br><br>Intra-abdominal residual disease<br>OS 48 months for RT0<br>OS 23 months for RT ≤ 1 cm<br>OS 14 months for RT > 1 cm<br><br>Extra-abdominal residual disease<br>OS 26 months for RT0<br>OS 38 months for RT ≤ 1 cm<br>OS 21 months for RT > 1 cm | PS, histology/grade, postoperative treatment, and intra-abdominal residual disease are independent predictors of survival in patients with stage IVb EC who underwent primary cytoreductive surgery, even in the presence of extra-abdominal metastasis. |
| Ueda et al    | 2010 | 33                                    | Retrospective study              | Surgical stage IVB endometrial cancer patients, undergoing primary surgery.             | Endometrioid 24; 72.7<br>Serous and clear cell 9; 27.3                                           | Intra-abdominal 15; 45.5<br><br>Extra-abdominal 18; 54.5                           | Residual tumor ≤ 2 cm 20;<br>Residual tumor > 2cm 13;                                                                                                                                                                                                               | None 3;<br>Chemotherapy 30;                                                               | OS 43 months for RT ≤ 2 cm<br>OS 6 months for RT > 2cm                                                                                                                                                                                                                                                                                                                     | Cytoreduction should be considered for all stage IVb endometrial cancers whose primary tumors are resectable, even those with extra-abdominal metastasis.                                                                                                |
| Landrum et al | 2009 | 55 EC patients<br><br>110 OC patients | Case-control retrospective study | Surgical stage IVB endometrial cancer patients with only intra-abdominal disease,       | EC 29; 53<br>Serous 24; 43<br>Endometrioid 2; 4<br>clear cell<br><br>OC 86; 80<br>Serous         | Intra-abdominal 55; 100<br>metastasis<br><br>Extra-abdominal 0<br>metastasis       | EC<br><br>Complete cytoreduction NA<br>Optimal cytoreduction 48; 87 (≤1 cm)<br>Suboptimal cytoreduction 7; 13<br><br>OC NA                                                                                                                                          | EC<br><br>Chemotherapy 33; 60<br>Chemo-radiation 14; 25<br>Radiation 8; 15<br><br>OC      | Two-year OS for the entire cohort: 52 vs. 76% for EC vs. OC.<br><br>For optimal cytoreduction,                                                                                                                                                                                                                                                                             | The current paradigm of treatment for advanced EC including aggressive cytoreduction followed by                                                                                                                                                         |

|  |  |  |  |                                                                   |                         |               |  |                                                                                     |                  |              |          |                                                                                                                                                             |                                                                                                                                                   |
|--|--|--|--|-------------------------------------------------------------------|-------------------------|---------------|--|-------------------------------------------------------------------------------------|------------------|--------------|----------|-------------------------------------------------------------------------------------------------------------------------------------------------------------|---------------------------------------------------------------------------------------------------------------------------------------------------|
|  |  |  |  | undergoing primary surgery, compared with stage IIIC OC patients. | endometrioid clear cell | 14; 13<br>1;1 |  | Complete cytoreduction<br>Optimal cytoreduction (≤1 cm)<br>Suboptimal cytoreduction | 99; 90<br>11; 10 | Chemotherapy | 110; 100 | OS at 2 years: 57 vs. 82%.<br><br>For suboptimal EC vs. OC patients: 33% vs. 66%.<br><br>Median PFS was 13 months vs. 20 months for all EC and OC patients. | platinum-based chemotherapy provides the most effective strategy for primary therapy at present. However, compared to OC, prognosis remains poor. |
|--|--|--|--|-------------------------------------------------------------------|-------------------------|---------------|--|-------------------------------------------------------------------------------------|------------------|--------------|----------|-------------------------------------------------------------------------------------------------------------------------------------------------------------|---------------------------------------------------------------------------------------------------------------------------------------------------|

*Table S2 Neoadjuvant chemotherapy in stage IVB EC. EC endometrial cancer; IDS interval debulking surgery; ITT intention to treat; NA not assessed; NACT neoadjuvant chemotherapy; OC ovarian cancer; OS overall survival; PFS progression free survival; PP per-protocol; PS performance status; RT residual tumor;*

| Author          | Year | N of patients | Type of study                    | Inclusion criteria                                                                 | Primary treatment<br>n;%                                                                 | Hystotype<br>N;%                                                                                                  | Localization of metastasis<br>N; %                                                     | Residual tumor<br>N;%                                                                                                                                                                                                                                                                          | Adjuvant treatment                                                                                                                                                           | Main results/<br>Survival                                                                                            | Main findings                                                                                                                         |
|-----------------|------|---------------|----------------------------------|------------------------------------------------------------------------------------|------------------------------------------------------------------------------------------|-------------------------------------------------------------------------------------------------------------------|----------------------------------------------------------------------------------------|------------------------------------------------------------------------------------------------------------------------------------------------------------------------------------------------------------------------------------------------------------------------------------------------|------------------------------------------------------------------------------------------------------------------------------------------------------------------------------|----------------------------------------------------------------------------------------------------------------------|---------------------------------------------------------------------------------------------------------------------------------------|
| Vandenput et al | 2009 | 30            | Retrospective study              | Stage IVB EC with transperitoneal spread ad laparoscopy                            | NACT, 3-4 cycles<br>30; 100                                                              | Endometriod<br>2; 6.7<br>Serous<br>27; 90<br>Clear cell<br>1; 3.3                                                 | Intra-abdominal metastasis<br>30;100<br><br>Extra-abdominal metastasis<br>0            | IDS<br>No surgery for disease progression<br>24; 80<br>6; 20<br><br>Complete cytoreduction<br>22; 92<br>Optimal cytoreduction (≤1 cm)<br>2; 8                                                                                                                                                  | NA                                                                                                                                                                           | PFS 13 months<br><br>OS 23 months<br><br>OS in inoperable patients 12 months<br><br>Postoperative complications: 17% | Use of NACT results in high complete cytoreduction rate and low postoperative morbidity.                                              |
| Nakanishi et al | 2023 | 51            | Multicentre, retrospective study | Stage IVB EC at preoperative imaging (CT, MRI, PET)                                | NACT, 3 cycles<br>51; 100                                                                | Endometrioid<br>34; 69.4<br>Serous<br>9; 18.4<br>Clear cell<br>2; 4.1<br>Adenosquamous<br>1; 2<br>Other<br>3; 6.1 | Intra-abdominal metastasis<br>33; 64.7<br><br>Extra-abdominal metastasis<br>18; 35.3   | IDS<br>No surgery for disease progression<br>33; 65<br>18; 35<br><br>Complete cytoreduction<br>21; 64<br>Residual disease (no diameter specified)<br>12; 36                                                                                                                                    | Adjuvant chemotherapy<br>29; 88                                                                                                                                              | Median overall survival 23.2 months                                                                                  | Neoadjuvant chemotherapy followed by debulking surgery is a feasible and acceptable treatment for stage IVB EC.                       |
| Eto et al       | 2013 | 426           | Multicentre, retrospective study | Clinical and surgical stage IVB EC (n 130 without clinical evidence of stage IVB). | NACT<br>125; 29.3<br><br>Primary surgery<br>279; 65.5<br><br>Palliative care<br>22; 5.16 | Endometrioid<br>245; 58<br><br>Non-endometrioid<br>181; 42                                                        | Intra-abdominal metastasis<br>197; 46.2<br><br>Extra-abdominal metastasis<br>229; 53.8 | IDS<br>59; 47<br><br>Complete cytoreduction<br>19; 32<br>Optimal cytoreduction (≤1 cm)<br>15; 25<br>Suboptimal cytoreduction<br>25; 43<br><br>Primary surgery<br>279<br><br>Complete cytoreduction<br>61; 22<br>Optimal cytoreduction (≤1 cm)<br>65; 23<br>Suboptimal cytoreduction<br>153; 55 | IDS<br>59<br><br>Chemotherapy or Radiotherapy<br>52; 88<br><br>Primary surgery<br>279<br><br>Chemotherapy Radiotherapy Chemo+radiotherapy<br>207; 74<br>41; 14.7<br>31; 11.3 | OS primary surgery group 21 months<br><br>OS NACT+IDS 21 months<br><br>OS NACT without IDS 7 months                  | Preoperative chemotherapy may be a useful treatment choice for patients with stage IVb EMCA who are not suitable for primary surgery. |

|              |      |                                 |                                            |                                                                                   |                                                                                                                                                                                 |                                                                                                                                                                              |                                                                                                                                                   |    |    |                                                                                                                                                                                                                                                                  |                                                                                                                                                                                                                                     |
|--------------|------|---------------------------------|--------------------------------------------|-----------------------------------------------------------------------------------|---------------------------------------------------------------------------------------------------------------------------------------------------------------------------------|------------------------------------------------------------------------------------------------------------------------------------------------------------------------------|---------------------------------------------------------------------------------------------------------------------------------------------------|----|----|------------------------------------------------------------------------------------------------------------------------------------------------------------------------------------------------------------------------------------------------------------------|-------------------------------------------------------------------------------------------------------------------------------------------------------------------------------------------------------------------------------------|
| Tobias et al | 2020 | 4890 stage IV<br>3922 stage IVB | Cohort study on National Cancer Database   | Stage IV EC < 70 yo                                                               | <div> <div>NACT</div> <div>952; 19.5</div> </div> <div> <div>Primary surgery</div> <div>3938; 80.5</div> </div>                                                                 | <div> <div>Endometrioid</div> <div>1337; 27.3</div> </div> <div> <div>Serous</div> <div>1077; 22</div> </div> <div> <div>Non-endometrioid</div> <div>2476; 50.6</div> </div> | NA                                                                                                                                                | NA | NA | <p>In the ITT analysis of all patients, survival was superior for women treated with NACT for the first 3 months after diagnosis. In the PP analysis, mortality was lower for the NACT group until the survival curves crossed after approximately 8 months.</p> | Women treated with PDS are at increased risk of early death but have a more favorable long-term prognosis.                                                                                                                          |
| Jooya et al  | 2023 | 5505                            | Retrospective analysis on SEER database    | Stage IVB EC receiving primary chemotherapy or primary surgery.                   | <div> <div>NACT</div> <div>930; 16.9</div> </div> <div> <div>Primary surgery</div> <div>3052; 55.4</div> </div> <div> <div>Chemotherapy only</div> <div>1523; 27.7</div> </div> | <div> <div>Endometrioid</div> <div>1608; 29.2</div> </div> <div> <div>Serous</div> <div>1671; 30.3</div> </div> <div> <div>Others</div> <div>2226; 40.4</div> </div>         | <div> <div>Intra-abdominal metastasis</div> <div>3558; 64.6</div> </div> <div> <div>Extra-abdominal metastasis</div> <div>1947; 35.4</div> </div> | NA | NA | <p>The median OS was 26 months for the primary surgery group, 25 months for the NACT-surg group, and 9 months for the CT alone group, respectively</p>                                                                                                           | <p>NACT-based approach was overall not associated with a difference in OS compared to a primary surgical approach. However, the NACT+IDSgroup showed improved survival outcomes in presence of distant-organ metastatic extent.</p> |
| Zhang et al  | 2023 | 1978                            | Propensity match analysis on SEER database | Stage IVB EC patients, receiving surgery and chemotherapy vs. chemotherapy alone. | <div> <div>Cancer directed surgery+chemo</div> <div>989; 50</div> </div> <div> <div>Chemotherapy alone</div> <div>989; 50</div> </div>                                          | <div> <div>Endometrioid</div> <div>503; 25.4</div> </div> <div> <div>Non-endometrioid</div> <div>1475; 74.6</div> </div>                                                     | <div> <div>Intra-abdominal metastasis</div> <div>928; 46.9</div> </div> <div> <div>Extra-abdominal metastasis</div> <div>1050; 53.1</div> </div>  | NA | NA | <p>Median overall survival times were 21 and 8 months in the cancer-directed surgery group and non-surgery group, respectively.</p>                                                                                                                              | <p>Surgical treatment can prolong the OS of patients, even if only primary site resection is performed. Surgery should be more aggressive in patients aged &lt; 60 years, and with lesions confined in the pelvis.</p>              |

|                      |      |    |                           |                                                                                                         |                                                                                                                                 |                                                               |                                                                                    |                                                                                                                                                                                                                                                                                     |                      |                                                                                                                                                                                                                                        |                                                                                                                                                                                                                                    |
|----------------------|------|----|---------------------------|---------------------------------------------------------------------------------------------------------|---------------------------------------------------------------------------------------------------------------------------------|---------------------------------------------------------------|------------------------------------------------------------------------------------|-------------------------------------------------------------------------------------------------------------------------------------------------------------------------------------------------------------------------------------------------------------------------------------|----------------------|----------------------------------------------------------------------------------------------------------------------------------------------------------------------------------------------------------------------------------------|------------------------------------------------------------------------------------------------------------------------------------------------------------------------------------------------------------------------------------|
| Kanno et al          | 2023 | 67 | Retrospective study       | Stage IVB EC with distant metastasis.                                                                   | <p>NACT 27; 40.3</p> <p>Primary surgery 23; 34.3</p> <p>Chemotherapy alone 17; 25.4</p>                                         | <p>Endometrioid 13; 19.4</p> <p>Non-endometrioid 54; 80.6</p> | <p>Intra-abdominal metastasis 34; 51</p> <p>Extra-abdominal metastasis 37; 100</p> | <p>IDS 27</p> <p>Complete cytoreduction 11; 40.7</p> <p>Optimal cytoreduction (<math>\leq 1</math> cm) 16; 59.3</p> <p>Primary surgery 23</p> <p>Complete cytoreduction 16; 69.6</p> <p>Optimal cytoreduction (<math>\leq 1</math> cm) 7; 30.4</p>                                  | NA                   | <p>OS for RT 0 27 months</p> <p>OS for optimal cytoreduction 12 months</p> <p>OS of patients receiving chemotherapy alone 7 months.</p> <p>OS 44 months in RT0 primary surgery group, vs 12 months in RT 0 patients the NACT group</p> | Complete cytoreduction could improve survival, even in patients with EC and distant metastases. Regardless of whether a case is primary surgery or IDS, surgery should be performed with the aim of achieving intra-abdominal RT0. |
| Wilkinson-Ryan et al | 2015 | 44 | Retrospective study       | Stage IVB EC patients with serous histology                                                             | <p>NACT 10; 22.7</p> <p>Primary surgery 34; 77.3</p>                                                                            | <p>Serous 26; 59</p> <p>Mixed (serous &gt; 50%) 18; 41</p>    | NA                                                                                 | <p>IDS 10</p> <p>Complete cytoreduction 7; 70</p> <p>Optimal cytoreduction (<math>\leq 1</math> cm) 3; 30</p> <p>Primary surgery 34</p> <p>Complete cytoreduction 11; 32.3</p> <p>Optimal cytoreduction (<math>\leq 1</math> cm) 17; 50</p> <p>Suboptimal cytoreduction 6; 17.7</p> | NA                   | <p>There was no difference in median PFS (10.4 versus 12.0 months) or OS (17.3 versus 20.7 months) between the NACT and primary surgery groups.</p>                                                                                    | Significant differences were found in operative time and day of discharge in favor of NACT without appearing to significantly worsen prognosis.                                                                                    |
| Bogani et al         | 2019 | 34 | Propensity-match analysis | Stage IVB serous EC for peritoneal dissemination, receiving NACT+IDS vs. primary surgery + chemotherapy | <p>NACT 15; 44.1</p> <p>Primary surgery 19; 55.9</p> <p>(of these, 15 patients were selected for propensity match analysis)</p> | Serous 34; 100                                                | Intra-abdominal metastasis 34; 100                                                 | <p>IDS 15; 50</p> <p>Complete cytoreduction 14; 93.3</p> <p>Optimal cytoreduction (<math>\leq 1</math> cm) 1; 6.7</p> <p>Primary surgery 15; 50</p> <p>Complete cytoreduction 13; 86.7</p> <p>Optimal cytoreduction (<math>\leq 1</math> cm) 2; 13.3</p>                            | Chemotherapy 30; 100 | Median PFS was 12.0 vs 15.3 months in the NACT vs primary surgery group. Median OS was 16.7 vs 18.0 months respectively                                                                                                                | NACT may be a valuable treatment modality for patients with unresectable stage IVB serous EC.                                                                                                                                      |

|             |      |    |                                  |                                                                                                        |                         |                      |        |         |                            |         |                                                                                                                                                                                        |                                                           |    |                                                                                                     |                                                                                                        |
|-------------|------|----|----------------------------------|--------------------------------------------------------------------------------------------------------|-------------------------|----------------------|--------|---------|----------------------------|---------|----------------------------------------------------------------------------------------------------------------------------------------------------------------------------------------|-----------------------------------------------------------|----|-----------------------------------------------------------------------------------------------------|--------------------------------------------------------------------------------------------------------|
| Unsal et al | 2022 | 42 | Multicentre, retrospective study | Stage IVB serous EC patients receiving NACT+IDS or primary surgery, with only intra-abdominal disease. | NACT<br>Primary surgery | 10; 23.8<br>32; 76.2 | Serous | 42; 100 | Intra-abdominal metastasis | 42; 100 | IDS<br><br>Complete cytoreduction<br>Optimal (≤1 cm) and suboptimal cytoreduction<br><br>Primary surgery<br><br>Complete cytoreduction<br>Optimal (≤1 cm) and suboptimal cytoreduction | 10<br><br>8; 80<br>2; 20<br><br>32<br><br>26; 81<br>6; 19 | NA | Study group had a 2-year PFS of 32% and 2-year OS of 73%. 5-year PFS was 25% and 5-year OS was 32%. | Receiving NACT did not affect survival outcomes in stage IVB EC patients with intra-abdominal disease. |
|-------------|------|----|----------------------------------|--------------------------------------------------------------------------------------------------------|-------------------------|----------------------|--------|---------|----------------------------|---------|----------------------------------------------------------------------------------------------------------------------------------------------------------------------------------------|-----------------------------------------------------------|----|-----------------------------------------------------------------------------------------------------|--------------------------------------------------------------------------------------------------------|

Table S3 Adjuvant treatment in stage IVB EC. EC endometrial cancer; NA not assessed; OS overall survival; PFS progression free survival.

| Author            | Year | N of patients                               | Type of study                                          | Inclusion criteria                                                                                                                 | Hystotype                                                                                                             | N;%                                                                    | Localization of metastasis                               | N; %                 | Adjuvant treatment                                                                           | Main results/Survival                                          | Main findings                                                                                                                                                                                                                  |                                                                                                                                                                        |
|-------------------|------|---------------------------------------------|--------------------------------------------------------|------------------------------------------------------------------------------------------------------------------------------------|-----------------------------------------------------------------------------------------------------------------------|------------------------------------------------------------------------|----------------------------------------------------------|----------------------|----------------------------------------------------------------------------------------------|----------------------------------------------------------------|--------------------------------------------------------------------------------------------------------------------------------------------------------------------------------------------------------------------------------|------------------------------------------------------------------------------------------------------------------------------------------------------------------------|
| Ayhan et al       | 2002 | 37                                          | Retrospective study                                    | Surgically treated stage IVB endometrial cancer patients                                                                           | Endometrioid<br>Others                                                                                                | 29; 78.4<br>8; 21.6                                                    | Intra-abdominal metastasis<br>Extra-abdominal metastasis | 31; 83.8<br>6; 16.2  | Chemo+radiotherapy<br>Only radiotherapy<br>Only chemotherapy                                 | 10; 33.3<br>10; 33.3<br>10; 33.3                               | Chemo+radiotherapy was associated with a median OS of 54 monts.<br><br>Median OS in case of only radiotherapy was 15 months, and 13 months for chemotherapy alone.                                                             | Concomitant chemo and radiotherapy provided the best survival benefit in stage IVB surgically treated EC patients.                                                     |
| Cirik et al       | 2016 | 65                                          | Retrospective study                                    | Stage IVB EC patients with only intra-abdominal metastasis, undergoing primary surgery.                                            | Endometrioid<br>Serous<br>Clear cell<br>Undifferentiated<br>Mixed                                                     | 38; 58.5<br>14; 21.5<br>6; 9.2<br>5; 7.7<br>2; 3.1                     | Intra-abdominal metastasis                               | 65; 100              | Only radiotherapy<br>Only chemotherapy<br>Chemo+radiotherapy<br>Other                        | 16; 24.6<br>31: 47.7<br>4; 6.1<br>14; 21.6                     | Two-years PFS in case of adjuvant chemotherapy vs. radiotherapy: 34.9 vs 11.1.<br><br>Two-years OS in case of adjuvant chemotherapy vs. radiotherapy: 44.5 vs 11.                                                              | Significant improvement in both PFS and OS by using systemic chemotherapy instead of only radiotherapy was shown in stage IVB patients with intra-abdominal disease.   |
| Barrington et al. | 2022 | 17890 stage IV<br><br>16133 stage IVB       | Analysis in national cancer registries (NCDB and SEER) | Stage IV EC                                                                                                                        | Endometrioid<br><br>Serous<br><br>Others                                                                              | 4185; 32.7<br>4426; 34.6<br>4185; 32.7                                 | NA                                                       |                      | Stage IVB<br><br>Chemotherapy alone<br><br>Chemo+EBRT<br><br>Chemo+VBT<br><br>Chemo+EBRT+VBT | 16133<br><br>12795; 79.3<br>2398; 14.9<br>758; 4.7<br>182; 1.1 | In both databases, use of any radiation in addition to chemotherapy was associated with improved OS. The addition of radiation to chemotherapy was associated with improved OS in all histologies except clear cell carcinoma. | Multimodality treatment was associated with improved OS in stage IVA and IVB EC patients.                                                                              |
| Haight et al.     | 2023 | 88<br><br>63 primary surgery<br><br>25 NACT | Retrospective study                                    | Surgically treated stage IVB endometrial cancer patients. The 63,6 % of patients were not suspected as stage IVB prior to surgery. | Endometrioid<br>Carcinosarcom<br>Clear cell<br>Dedifferentiated/undifferentiated<br>Mixed<br>Serous<br>High grade ESS | 35; 39.8<br>12; 13.6<br>1; 1.1<br>4; 4.5<br>7; 8<br>28; 31.8<br>1; 1.1 | Intra-abdominal metastasis<br>Extra-abdominal metastasis | 63; 71.6<br>25; 28.4 | None<br>EBRT<br>Chemotherapy<br>Chemotherapy + EBRT<br>Chemotherapy + EBRT + VBT             | 11; 12.5<br>1; 1.1<br>59; 67<br>11; 12.5<br>6; 6.8             | Multimodal adjuvant treatment improved PFS,but not OS, even in patients with pelvic confined disease.                                                                                                                          | This study confirms the lack of known OS benefit for adjuvant radiation in advanced EC extends to those with FIGO stage IVB disease, even when confined to the pelvis. |
